# Supplementary material for: High-precision, stretchable kirigami-capacitive sensor with ultra-low cross-sensitivity for body temperature monitoring
Source: Royal Society of Chemistry journal article supplement (doi:10.1039/d1ta06978k), 2021-01-01
Supplement: d1ta06978k1.pdf [file d1ta06978k1.pdf]

## Supporting Information

High-precision, stretchable kirigami-capacitive sensors with ultra-low cross-sensitivity for body temperature monitoring

Yuyan Yu,<sup>1</sup> Shuhua Peng,<sup>1</sup> Zhao Sha,<sup>1</sup> Xinying Cheng,<sup>1</sup> Shuying Wu,<sup>2,1\*</sup> and Chun H. Wang<sup>1\*</sup>

<sup>1</sup>*School of Mechanical and Manufacturing Engineering, University of New South Wales, Sydney, NSW 2052, Australia*

<sup>2</sup>*School of Engineering, Macquarie University, Sydney NSW 2109, Australia*

\*Correspondence author: [chun.h.wang@unsw.edu.au](mailto:chun.h.wang@unsw.edu.au); [shuying.wu@mq.edu.au](mailto:shuying.wu@mq.edu.au)

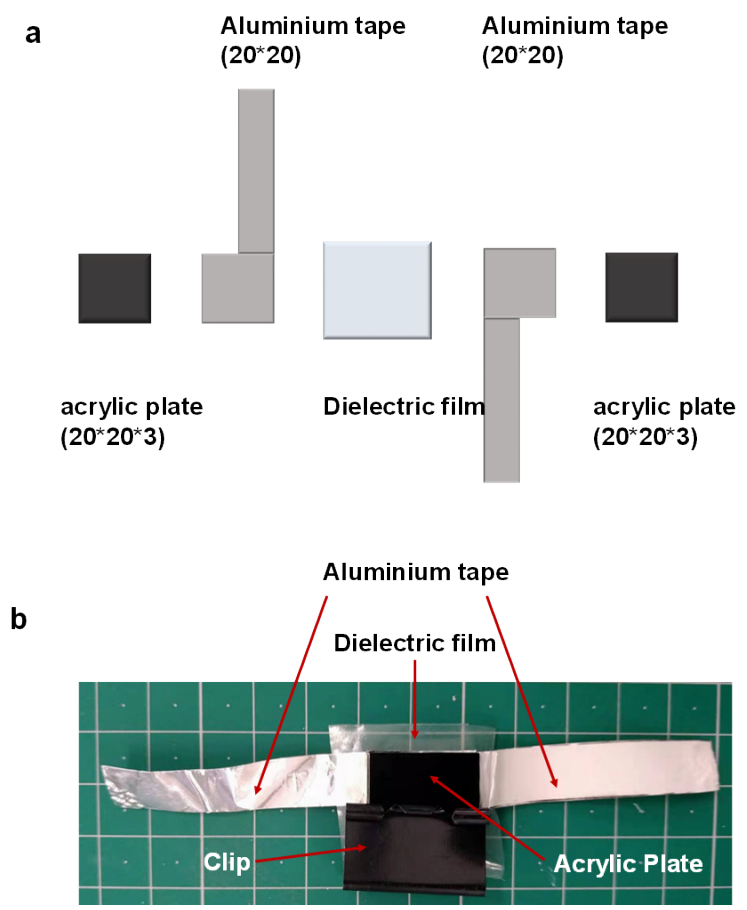

Fig. S1 Diagram (a) and optical image (b) of the testing fixture for dielectric constant.

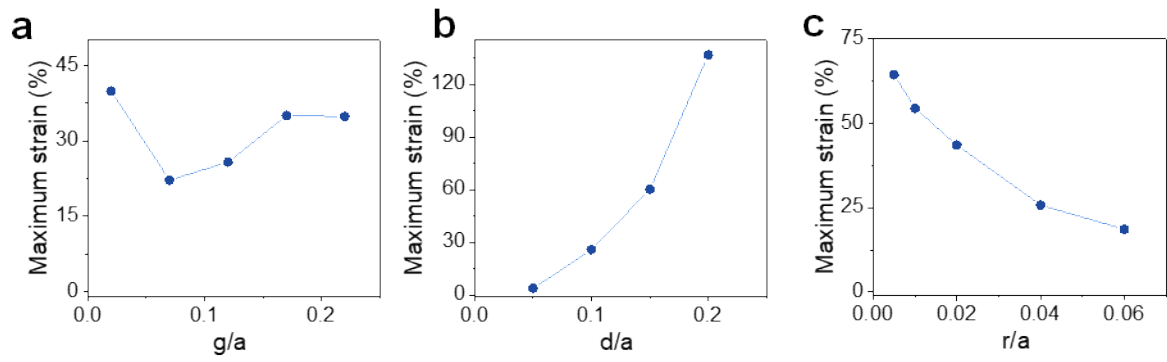

Fig. S2 Maximum strain at 100% external strain versus geometry parameters. For (a),  $l = 8\text{mm}$ ,  $d = 1\text{mm}$ ,  $r = 0.4\text{ mm}$ ; for (b),  $l = 8\text{mm}$ ,  $g = 2\text{ mm}$ ,  $r = 0.4\text{ mm}$ ; for (c),  $l = 8\text{mm}$ ,  $d = 1\text{mm}$ ,  $g = 2\text{ mm}$ .

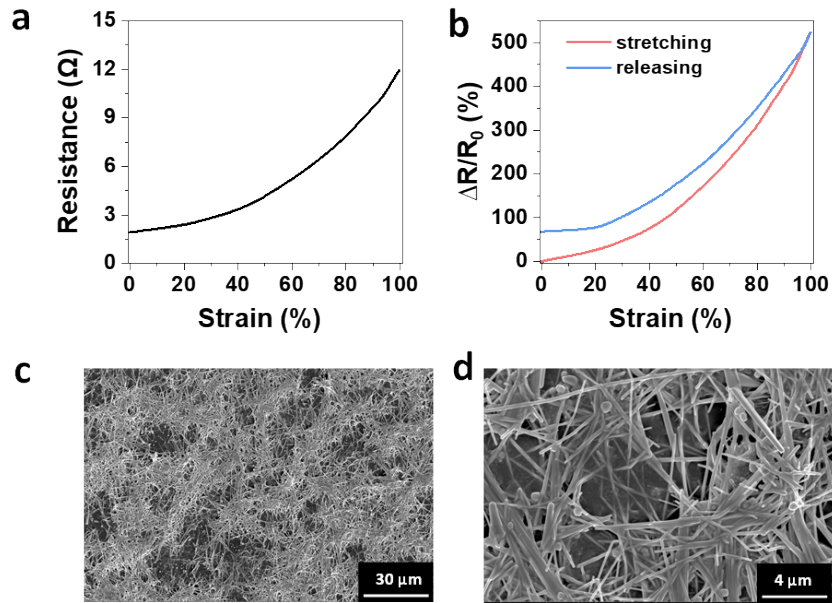

Fig. S3 (a) Resistance of the AgNWs electrode (L: 20 mm, W: 10 mm) under strain up to 100% strain; (b) Relative resistance changes of the AgNWs electrode (L: 20 mm, W: 10 mm) in a 100% strain cycle; (c) and (d) top view SEM images of the AgNWs electrode layer.

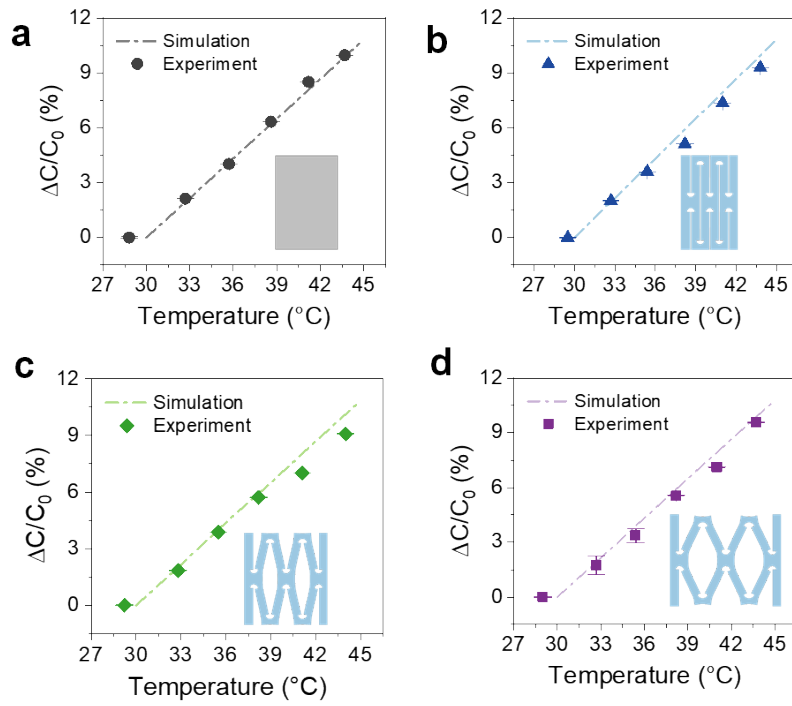

Fig. S4 Simulated and experimental relative capacitance change of sensors over temperature. (a) Uncut sensor, Kirigami sensor at 0% (b), 50% (c), and 100% (d) strains.

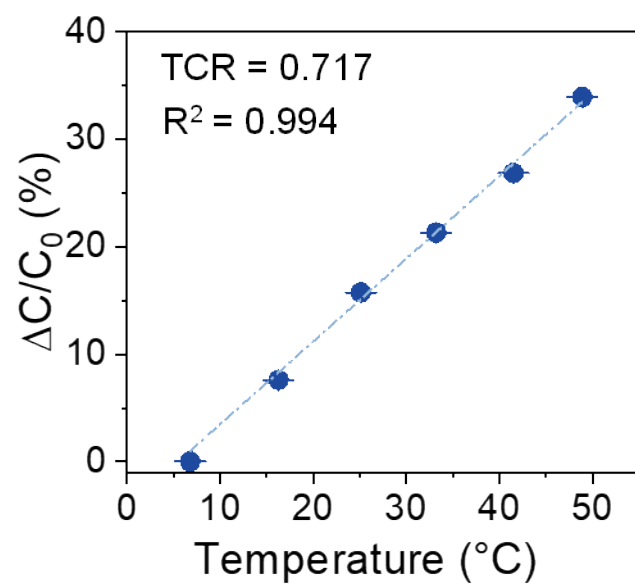

Fig. S5 Relative capacitance change of the kirigami AgNWS-TPU sensor in the temperature range from 5 to 50 °C.

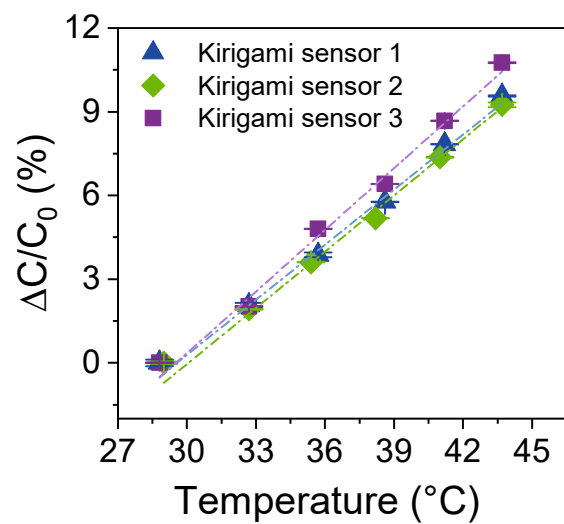

Fig. S6 Relative capacitance change of three individually-made TPU-AgNWs sensors upon heating.

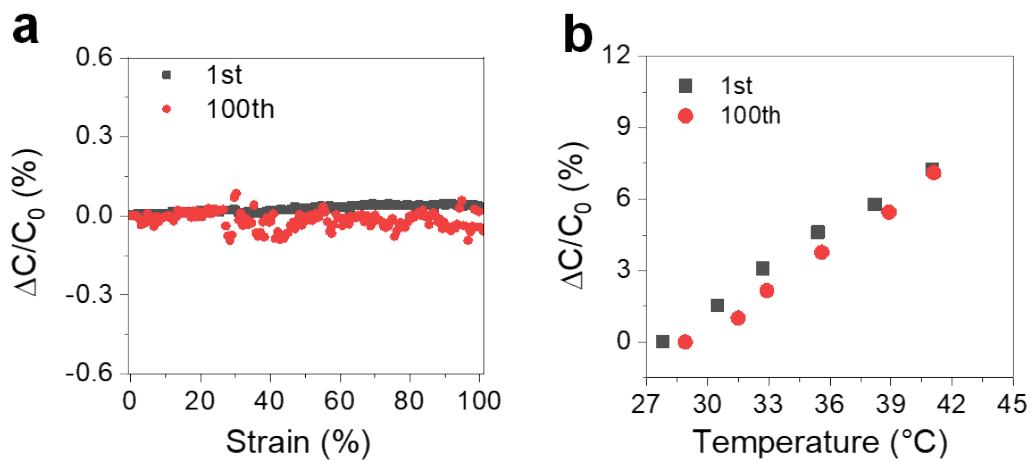

Fig. S7 (a) The relative capacitance changes of the AgNWs-TPU sensor at the 1<sup>st</sup> and 100<sup>th</sup> stretching cycles; (b) The relative capacitance changes of the AgNWs-TPU sensor upon heating after the 1<sup>st</sup> and 100<sup>th</sup> stretching cycles.



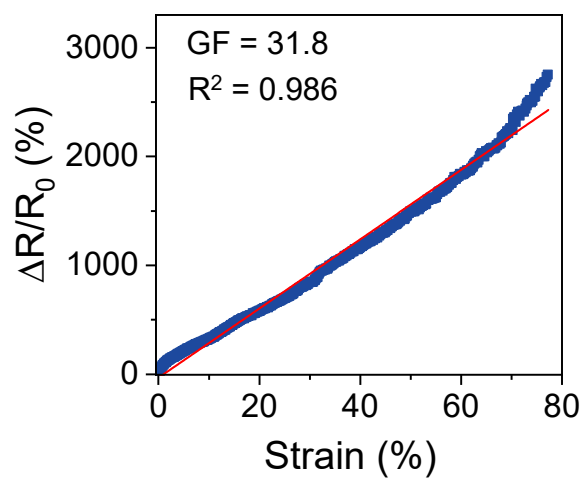

Fig. S8 The relative resistance changes of the CNF-reinforced strain sensor when being stretched.

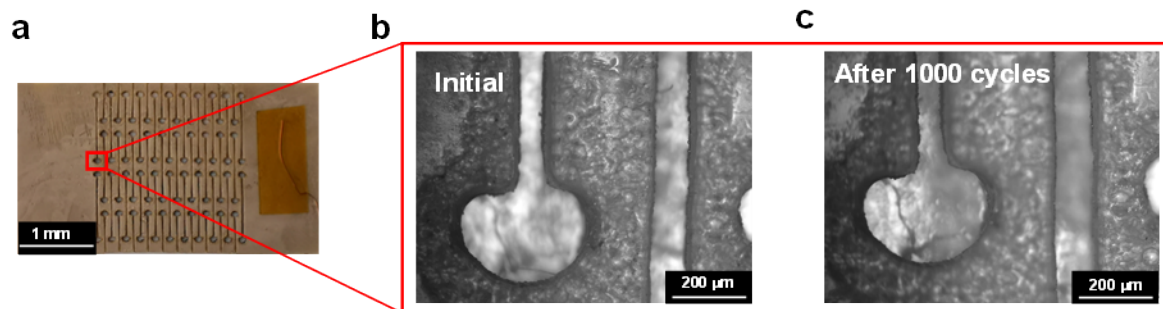

Fig. S9 Optical images of kirigami sensor (a) and the conjunction area of this sensor before (a) and after (b) 1000 80% strain cycles.

Table S1. Temperature sensitivity of three random sensors made under the same conditions

| Sensors                  | Temperature sensitivity<br>( $^{\circ}\text{C}^{-1}$ ) |
|--------------------------|--------------------------------------------------------|
| Sensor 1                 | 0.0070                                                 |
| Sensor 2                 | 0.0063                                                 |
| Sensor 3                 | 0.0073                                                 |
| Standard variation       | 0.0005                                                 |
| Coefficient of variation | 7.5%                                                   |

Table S2. Summary of recently reported strain-insensitive temperature sensors.

| Sensors                     | Sensor type | Range (°C) | Sensitivity (°C <sup>-1</sup> ) | Linearity | Resolution (°C) | Strain range | Reference |
|-----------------------------|-------------|------------|---------------------------------|-----------|-----------------|--------------|-----------|
| FSSF                        | Resistive   | 30 - 80    | 0.008                           | linear    | 0.37            | 50%          | 1         |
| AgNWs- PI                   | Resistive   | 25-60      | 0.0038                          | Linear    | 0.16            | 100%         | 2         |
| Graphene PDMS               | Resistive   | 25 -75     | 0.0076                          | Linear    | N/A             | 20%          | 3         |
| PEDOT:PSS /SWCNTs Fibre     | Resistive   | 20 - 50    | 0.0093                          | Nonlinear | N/A             | 220%         | 4         |
| carbon nanotube transistors | Circuit     | 15-55      | -25 mV                          | 0.99      | 2               | 60%          | 5         |
| SWCNTs/AgNW sensor          | Circuit     | 0-100      | 37 mV                           | Linear    | N/A             | 40%          | 6         |
| AgNWs-TPU sensor            | Capacitive  | 30 - 45    | 0.007                           | 0.997     | 0.14            | 100%         | This work |

Reference:

1. T. Q. Trung, T. M. L. Dang, S. Ramasundaram, P. T. Toi, S. Y. Park, N.-E. J. A. a. m. Lee and interfaces, *Acs Applied Materials & Interfaces*, 2018, 11, 2317-2327.
2. Z. Cui, F. R. Pobleto and Y. Zhu, *ACS applied materials interfaces*, 2019, 11, 17836-17842.
3. Z. Wang, W. Gao, Q. Zhang, K. Zheng, J. Xu, W. Xu, E. Shang, J. Jiang, J. Zhang, Y. J. A. a. m. Liu and interfaces, *Acs Applied Materials & Interfaces*, 2018, 11, 1344-1352.
4. J. Lee, D. Kim, S. Chun, J. H. Song, E. S. Yoo, J. K. Kim and C. Pang, *Advanced Materials Technologies*, 2020, 5, 2000073.
5. C. Zhu, A. Chortos, Y. Wang, R. Pfattner, T. Lei, A. C. Hinckley, I. Pochorovski, X. Yan, J. W.-F. To and J. Y. J. N. E. Oh, *Nature Electronics*, 2018, 1, 183-190.
6. Y. Y. Xin, J. Zhou and G. Lubineau, *Journal of Materials Chemistry A*, 2019, 7, 24493-24501.
